# Supplementary material for: The Prophylactic and Multimodal Activity of Two Isatin Thiosemicarbazones against Alzheimer’s Disease In Vitro
Source: MDPI journal article supplement (doi:10.3390/brainsci12060806), 2022-06-19
Supplement: s1 [file s1]

# The prophylactic and multimodal activity of two isatin thiosemicarbazones against Alzheimer's disease in vitro

Barbara Mavroidi<sup>1</sup>, Archontia Kaminari<sup>1\*</sup>, Dimitris Matiadis<sup>1</sup>, Dimitra Hadjipavlou-Litina<sup>2</sup>, Maria Pelecanou<sup>1</sup>, Athina Tzinia<sup>1</sup>, Marina Sagnou<sup>1\*</sup>

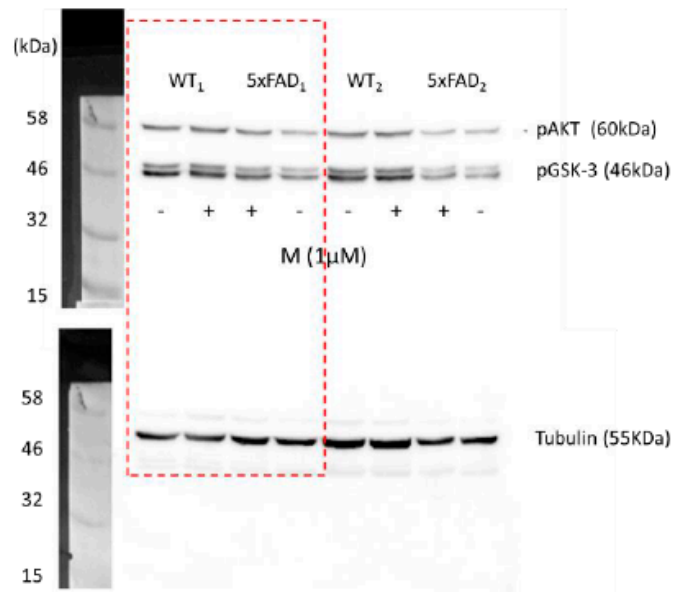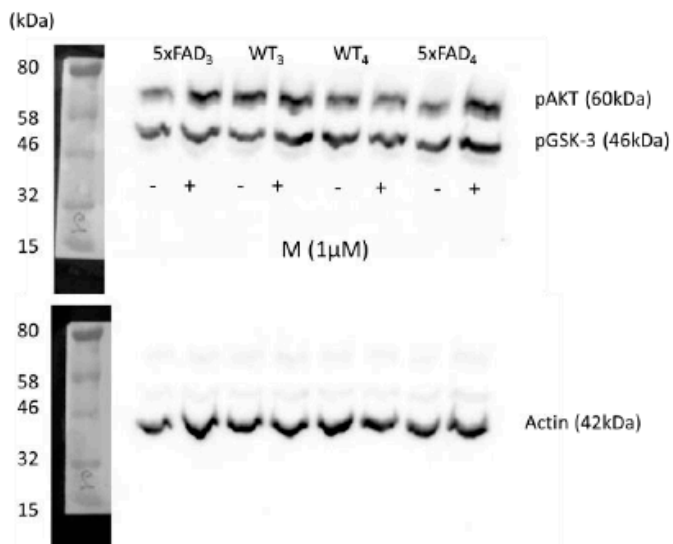

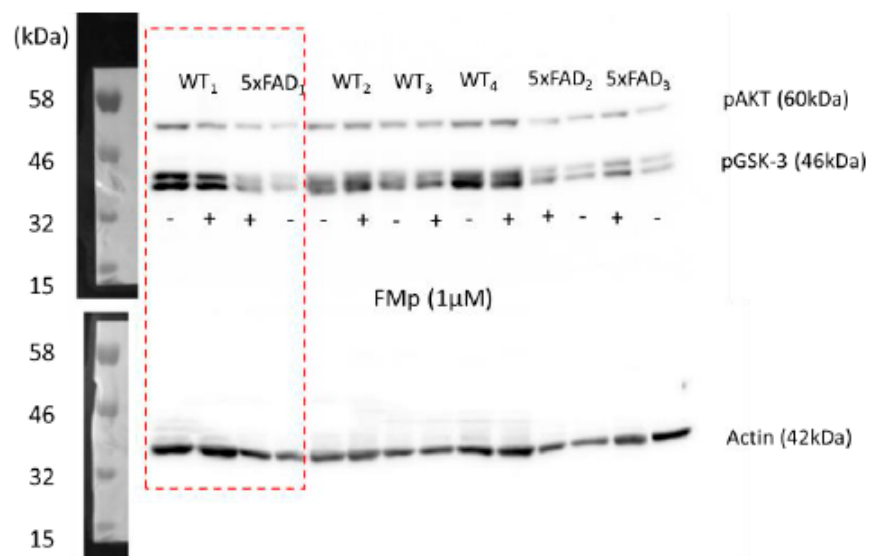

**Figure S1: Full-length western blots.** Red brackets depict samples selected as representative results from 3 to 4 biological replicates per Isatin treatment. Please note that selected 5xFAD samples have been inverted in the final text for presentation purposes.
